# Supplementary material for: Hydrodynamics of an in-pond raceway system with an aeration plug-flow device for application in aquaculture: an experimental study
Source: R Soc Open Sci. 2019 Jul 10;6(7):182061. doi: 10.1098/rsos.182061 (PMC6689605; doi:10.1098/rsos.182061)
Supplement: Cross-section data [file rsos182061supp2.xlsx]

## Sheet: x=-40
y	z	u	v	w
1	5	0.20402	0.85754	0.59219
1	10	-0.16979	0.5456	0.10077
1	15	0.08808	-0.368	0.3863
1	20	0.22041	-0.71647	0.40679
1	25	0.22664	-0.09153	0.25556
1	30	0.16264	-0.48603	0.52584
--	--	--	--	--
5	5	0.78068	1.22298	-0.30881
5	10	1.38041	1.6951	0.14101
5	15	1.44845	1.0148	-0.67271
5	20	0.49683	0.27364	-0.46986
5	25	-0.79936	-1.17178	-1.21519
5	30	0.01629	-0.45827	0.16844
--	--	--	--	--
10	5	0.97508	1.05542	0.66386
10	10	1.53405	1.45279	0.4083
10	15	1.65732	1.10098	0.38044
10	20	0.63503	0.77578	0.14468
10	25	0.54333	0.25691	-0.3845
10	30	-0.09511	-1.30776	-0.28594
--	--	--	--	--
15	5	1.4876	0.91795	0.67457
15	10	2.15137	0.89328	0.4393
15	15	1.4421	0.58155	0.12126
15	20	1.32215	0.39314	-0.14268
15	25	1.75923	-0.34565	-0.67061
15	30	1.20237	-0.42185	-0.12847
--	--	--	--	--
20	5	1.3464	0.26657	0.53291
20	10	1.91547	0.27407	0.70192
20	15	1.9902	0.31235	0.61144
20	20	1.46278	0.32984	0.06819
20	25	1.12004	-0.32264	-0.03273
20	30	0.25287	-0.54503	-0.48141
--	--	--	--	--
25	5	0.7385	-0.1917	0.17859
25	10	1.31673	-0.31833	0.16154
25	15	1.04035	-0.15083	0.37558
25	20	1.14675	0.19167	0.03188
25	25	0.55168	-0.30887	-0.22991
25	30	-0.36274	-0.06522	-0.56825
--	--	--	--	--
29	5	1.16193	0.32057	0.77394
29	10	0.84702	-0.17521	0.27902
29	15	0.75146	0.08292	-0.07243
29	20	0.70212	-0.01967	0.01013
29	25	0.43842	-0.04068	-0.03976
29	30	0.05144	0.1874	-0.01718

## Sheet: x=5
y	z	u	v	w
1	5	-0.51006	0.00801	0.44796
1	10	-0.64581	-0.0257	2.32377
1	15	-0.72829	-0.01069	2.89438
1	20	-0.30174	-0.07309	1.61057
1	25	-0.37087	-0.1272	0.46901
1	30	1.43806	-0.07083	0.35511
--	--	--	--	--
5	5	-1.81119	1.77536	2.64661
5	10	-1.70252	-0.26481	2.92432
5	15	-2.19333	-0.61134	1.84439
5	20	-2.31556	-1.44561	1.77784
5	25	-0.95208	-4.7239	0.61566
5	30	9.95324	-6.6762	2.01226
--	--	--	--	--
10	5	-2.32894	1.6609	-0.90812
10	10	-2.8546	-0.17343	1.26151
10	15	-4.41583	-0.89808	0.61092
10	20	-6.73732	-3.15464	1.73557
10	25	-3.61606	-8.88547	2.8616
10	30	8.92114	-4.26695	-0.96284
--	--	--	--	--
15	5	-1.91622	2.76968	-0.02998
15	10	-2.634	0.00666	-0.49917
15	15	-4.09601	-1.22534	1.36977
15	20	-5.90657	-4.71669	2.23125
15	25	1.54429	-12.3308	2.12555
15	30	12.1593	-10.0998	-1.54071
--	--	--	--	--
20	5	-2.43578	2.40577	0.81037
20	10	-1.72285	0.57964	2.91589
20	15	-2.74133	-0.86852	2.21066
20	20	-4.19966	-1.55541	2.75204
20	25	0.50963	-4.41097	0.7096
20	30	0.57761	-3.02278	1.56381
--	--	--	--	--
25	5	-3.77415	1.65718	1.1786
25	10	-2.66372	0.68077	3.17645
25	15	-4.32702	-0.14214	3.09187
25	20	-4.22175	-1.07766	2.91795
25	25	-3.30855	-0.51167	3.0438
25	30	-4.70269	-0.79072	1.33053
--	--	--	--	--
29	5	-4.47653	0.22016	0.62879
29	10	-2.51309	0.00166	1.67304
29	15	-1.08278	-0.04581	1.18068
29	20	-0.8952	-0.087	0.68897
29	25	-0.57504	-0.03329	0.51278
29	30	-0.75923	-0.02606	-0.47084

## Sheet: x=20
y	z	u	v	w
1	5	-0.08153	0.0749	0.73574
1	10	0.51754	0.0497	2.2847
1	15	1.8411	-0.07856	3.07947
1	20	1.44753	0.03724	1.20055
1	25	2.19082	0.00156	0.31514
1	30	1.13626	0.10458	0.19152
--	--	--	--	--
5	5	1.05539	2.8981	3.74535
5	10	0.46966	-0.36096	3.78456
5	15	1.6125	-1.51386	3.71188
5	20	2.96855	-2.03349	3.96804
5	25	5.21886	-4.14066	2.71471
5	30	11.9915	-2.92903	1.57205
--	--	--	--	--
10	5	-1.12681	3.29362	0.03566
10	10	-3.10502	-0.88428	1.6315
10	15	-4.6149	-1.96285	-0.5046
10	20	-3.12681	-1.92806	1.17455
10	25	1.25489	-4.36218	1.00545
10	30	11.5184	-6.99356	-1.05439
--	--	--	--	--
15	5	-1.31032	2.97575	0.77001
15	10	-3.26751	0.30184	0.77261
15	15	-4.95299	-1.41444	0.22421
15	20	-5.22721	-2.69702	0.83002
15	25	-3.8269	-1.98398	1.92971
15	30	3.83637	-5.95049	1.177
--	--	--	--	--
20	5	-3.25934	3.37617	1.22336
20	10	-2.7038	0.97672	2.30632
20	15	-3.41499	-1.28995	1.50735
20	20	-5.18241	-1.84593	2.36739
20	25	-4.75287	-1.37037	2.5819
20	30	-4.01228	-3.8521	-0.90112
--	--	--	--	--
25	5	-3.15748	2.37431	1.48818
25	10	-3.5732	0.90597	3.51393
25	15	-4.92728	-0.72095	3.43985
25	20	-5.81448	-1.51582	3.03306
25	25	-4.76494	-1.80748	1.63057
25	30	-4.89919	-2.17695	-1.61094
--	--	--	--	--
29	5	-2.55366	0.21822	1.14272
29	10	-1.71611	0.00388	1.38076
29	15	-3.74367	-0.22453	2.36934
29	20	-2.3379	-0.11194	0.45678
29	25	-0.13338	0.0173	0.08622
29	30	-1.19087	-0.04921	-0.71676

## Sheet: x=40
y	z	u	v	w
1	5	0.61359	-0.01656	0.10909
1	10	0.53995	-0.0547	-0.06328
1	15	3.36017	0.00295	2.52323
1	20	0.74695	-0.02181	0.11552
1	25	3.36417	0.02983	1.07741
1	30	6.96696	-0.33944	-0.45261
--	--	--	--	--
5	5	3.74382	2.25642	3.67587
5	10	1.37868	1.80755	-2.25889
5	15	5.25309	-0.39608	4.43349
5	20	8.32216	-1.33428	4.9807
5	25	10.9781	-1.73718	4.06975
5	30	14.3186	-2.72164	3.47822
--	--	--	--	--
10	5	-1.62895	2.7916	-0.26923
10	10	-2.69292	0.36778	-0.06667
10	15	-2.94698	-1.00272	-0.94436
10	20	-0.10289	-0.71621	-1.42442
10	25	3.87642	-2.85464	-1.56486
10	30	7.43111	-3.19757	-1.83203
--	--	--	--	--
15	5	-2.70351	2.54756	-0.01968
15	10	-4.22944	0.33404	1.15166
15	15	-4.67809	-1.06452	-0.57859
15	20	-5.47308	-3.44012	-0.21908
15	25	-1.22151	-3.71124	-1.07671
15	30	-2.4368	-0.30545	-1.43733
--	--	--	--	--
20	5	-3.84502	2.53244	1.14949
20	10	-4.95768	-0.04705	0.53301
20	15	-5.47186	-0.86447	-0.24819
20	20	-5.48404	-2.08375	-0.41169
20	25	-3.82576	-2.68764	-1.83328
20	30	-5.48512	-0.29569	-1.26922
--	--	--	--	--
25	5	-4.59067	1.77445	0.85259
25	10	-4.34958	0.41365	2.48711
25	15	-4.92182	-0.74878	1.90474
25	20	-5.12899	-1.6001	0.01336
25	25	-5.45335	-1.3201	-0.00902
25	30	-5.95119	-0.96153	0.84057
--	--	--	--	--
29	5	-0.73457	0.04832	0.32549
29	10	-1.23299	-0.09963	0.22931
29	15	-3.74129	-0.03139	2.1078
29	20	-0.37327	0.0467	0.34433
29	25	-0.63991	-0.05691	-0.29886
29	30	-0.82369	-0.00741	-0.02723

## Sheet: x=60
y	z	u	v	w
1	5	0.90774	-0.06158	0.07954
1	10	2.20409	-0.01976	0.71269
1	15	8.36812	-0.52293	5.56117
1	20	1.43639	-0.06939	0.54515
1	25	4.11686	0.06704	1.99482
1	30	7.98783	-0.06896	2.27114
--	--	--	--	--
5	5	6.02855	1.86763	2.99332
5	10	3.8069	1.5757	-2.66404
5	15	7.27694	-0.61945	5.52025
5	20	8.20759	-0.98912	5.71628
5	25	12.0477	-1.63565	4.07636
5	30	11.3581	-2.06237	2.41357
--	--	--	--	--
10	5	0.50195	2.95519	-1.18106
10	10	1.16045	1.62409	-1.12153
10	15	1.04968	0.21193	-2.02703
10	20	3.4213	-0.19606	-2.18783
10	25	4.41192	-1.44321	-1.65781
10	30	-0.87562	-0.70682	-1.20168
--	--	--	--	--
15	5	-0.56809	2.7261	-0.1527
15	10	-0.62639	1.80366	-0.87196
15	15	-1.65288	0.54275	-2.22174
15	20	-0.80701	0.13763	-2.02748
15	25	-1.98431	-0.00899	-1.64665
15	30	-4.71241	-1.26611	-0.66516
--	--	--	--	--
20	5	-1.87382	2.1228	-0.20491
20	10	-2.08186	0.9473	-0.34627
20	15	-2.33674	1.12516	-0.9897
20	20	-3.22889	-0.83394	-1.31158
20	25	-4.17975	0.048	-0.20451
20	30	-4.57661	-1.60998	1.01188
--	--	--	--	--
25	5	-3.10215	0.9758	0.90462
25	10	-2.75721	0.72351	1.66609
25	15	-3.14323	0.28783	2.16291
25	20	-3.34544	-0.27377	1.39497
25	25	-3.92794	-0.36688	1.60573
25	30	-5.11263	-1.34606	2.40449
--	--	--	--	--
29	5	-3.58155	0.25339	1.29963
29	10	-3.61071	0.17337	3.367
29	15	-2.57974	-0.0041	5.0625
29	20	-0.87957	-0.00368	0.66973
29	25	-0.76807	-0.00946	1.3266
29	30	-0.96469	-0.06754	0.08364

## Sheet: x=80
y	z	u	v	w
1	5	0.43691	0.04738	0.36055
1	10	0.74816	-0.01737	-0.45712
1	15	1.12237	-0.02404	0.67853
1	20	2.13917	-0.39228	-1.38578
1	25	0.93409	-0.08857	-0.37622
1	30	1.5741	0.03888	-0.09122
--	--	--	--	--
5	5	6.45159	1.20803	2.51112
5	10	5.03601	1.6682	-2.97124
5	15	8.56851	-0.33754	4.9115
5	20	8.32642	-0.97192	4.06365
5	25	7.85755	-1.05289	2.0369
5	30	6.91935	-0.98437	0.58011
--	--	--	--	--
10	5	1.11953	1.9524	-0.76461
10	10	3.15105	1.41652	-1.31099
10	15	1.47081	0.68798	-1.8646
10	20	2.1696	-0.07951	-1.32394
10	25	-0.17745	0.03974	-1.62253
10	30	-1.7695	-0.74103	-1.37485
--	--	--	--	--
15	5	-0.5756	1.96579	-0.76236
15	10	1.46303	2.15939	-0.70134
15	15	0.11567	0.78641	-0.24067
15	20	-1.4995	0.51549	-0.58218
15	25	-2.72089	0.23317	0.09467
15	30	-4.27186	-1.75732	-0.35995
--	--	--	--	--
20	5	-0.76953	2.31603	0.39617
20	10	0.14807	1.73899	0.42147
20	15	-0.76534	1.74476	0.22338
20	20	-2.25952	0.54407	0.15972
20	25	-2.69127	-0.67071	0.97428
20	30	-4.3043	-1.72308	1.76087
--	--	--	--	--
25	5	-1.52395	1.43021	0.8867
25	10	-0.78787	0.68685	1.9532
25	15	-1.77097	-0.24378	3.16348
25	20	-1.988	-0.28063	2.78239
25	25	-3.003	0.02525	2.19247
25	30	-3.91927	-1.32616	2.11394
--	--	--	--	--
29	5	-2.03437	0.41728	1.27934
29	10	-0.27995	0.04993	1.09155
29	15	-1.52617	0.000679295	3.3362
29	20	-0.97262	0.00237	1.66252
29	25	-1.73048	-0.0757	1.23197
29	30	-0.91382	-0.01363	1.10341

## Sheet: x=100
y	z	u	v	w
1	5	0.75463	-0.0708	-0.15074
1	10	0.66182	-0.06221	-0.10844
1	15	5.33999	-0.14492	2.58337
1	20	0.87572	0.0654	0.63141
1	25	1.12401	-0.1543	-0.76663
1	30	0.85046	-0.04913	-0.02572
--	--	--	--	--
5	5	5.85817	1.05477	1.51733
5	10	5.87624	1.58081	-1.70904
5	15	6.03834	-0.0814	3.11633
5	20	5.2107	-0.54915	1.84446
5	25	4.40456	-0.49422	1.02397
5	30	7.21549	-1.03644	0.42399
--	--	--	--	--
10	5	2.17438	1.8974	-0.58833
10	10	3.31076	2.20399	-0.58984
10	15	1.79247	1.37476	-0.8647
10	20	1.27897	0.69573	0.01051
10	25	-0.69455	0.2424	-1.42284
10	30	-0.78897	-0.06762	-0.80023
--	--	--	--	--
15	5	2.12294	2.37594	-0.38637
15	10	2.00967	1.38649	0.04292
15	15	-0.03382	0.79935	0.19865
15	20	-0.23451	1.20272	0.04279
15	25	-1.80807	-0.12272	-0.17788
15	30	-2.71897	-0.83751	-0.54799
--	--	--	--	--
20	5	0.34476	1.44982	0.72101
20	10	0.62243	1.23903	1.26883
20	15	-0.83582	0.38069	1.36388
20	20	-1.49341	0.07123	1.65232
20	25	-1.97956	-0.24595	0.41235
20	30	-1.91005	-1.79153	1.77479
--	--	--	--	--
25	5	0.1325	0.9233	0.72554
25	10	0.43154	1.00438	2.48689
25	15	-0.06176	0.32979	2.80469
25	20	-1.19996	-0.15833	2.99847
25	25	-1.69847	-0.09307	2.28262
25	30	-2.66389	-0.42839	2.60911
--	--	--	--	--
29	5	-0.44248	0.11014	0.68601
29	10	-0.19603	-0.01955	1.0477
29	15	-0.8175	-0.08199	1.57246
29	20	-0.50092	0.02325	1.07265
29	25	-0.86199	-0.11771	0.28018
29	30	-0.55729	-0.0761	0.25616

## Sheet: x=120
y	z	u	v	w
1	5	1.12832	-0.00267	-0.0322
1	10	0.81349	-0.02663	0.06512
1	15	1.75334	-0.04292	1.54975
1	20	0.85196	-0.05255	0.45807
1	25	2.25475	-0.18324	1.46812
1	30	0.58624	-0.09267	0.57953
--	--	--	--	--
5	5	2.79185	0.51255	0.6841
5	10	2.93594	1.45972	-0.56353
5	15	2.5355	0.35721	1.20261
5	20	2.75545	-0.07071	0.92926
5	25	2.72762	0.37091	0.51572
5	30	1.94726	-0.36038	0.51214
--	--	--	--	--
10	5	2.43006	1.54199	-0.74874
10	10	3.1852	2.15962	-0.50008
10	15	1.27109	1.46223	-0.27946
10	20	0.4021	1.31913	-0.24479
10	25	0.77465	0.20598	-0.37913
10	30	0.16047	-0.35169	-0.2018
--	--	--	--	--
15	5	1.03703	1.72126	-0.24339
15	10	2.45541	1.92568	-0.09081
15	15	0.53535	1.44753	0.22322
15	20	-0.18699	0.65718	-0.27061
15	25	-1.241	-0.0271	0.0468
15	30	0.46669	-0.97355	-0.00313
--	--	--	--	--
20	5	1.03373	1.95353	0.46065
20	10	1.94829	1.76041	1.00869
20	15	1.0835	1.13169	0.81735
20	20	-0.22551	0.4997	1.27213
20	25	-0.0443	0.69749	1.10056
20	30	0.20592	-1.00388	1.32372
--	--	--	--	--
25	5	0.18833	1.67223	0.75722
25	10	2.44838	1.15659	1.65225
25	15	1.88049	0.4895	2.71101
25	20	0.45821	0.37254	2.5033
25	25	0.03919	-0.18192	2.5494
25	30	1.1916	-0.83973	2.43731
--	--	--	--	--
29	5	-0.66355	0.30125	0.54763
29	10	0.21904	-0.13242	-0.52055
29	15	1.68315	0.01524	3.38966
29	20	0.02378	0.01474	0.52097
29	25	0.01193	0.01394	0.20884
29	30	0.15175	0.02007	0.40073

## Sheet: x=140
y	z	u	v	w
1	5	2.33436	-0.15948	-0.35539
1	10	0.13281	-0.04181	0.14272
1	15	0.87346	-0.17462	0.82807
1	20	0.12494	-0.03347	0.04452
1	25	1.18297	-0.17148	0.75066
1	30	0.116	-0.14063	0.07228
--	--	--	--	--
5	5	1.53328	0.07556	-0.04066
5	10	0.99145	0.97599	0.07372
5	15	1.03817	0.09673	0.8446
5	20	0.75742	-0.05816	0.55965
5	25	0.86398	-0.48228	0.75088
5	30	0.5593	-0.89603	0.37959
--	--	--	--	--
10	5	2.02415	0.90141	0.01429
10	10	1.47003	1.27287	-0.04166
10	15	0.44998	0.89513	0.00486
10	20	0.5891	1.0393	0.04204
10	25	0.2848	0.03764	-0.61446
10	30	0.52743	-0.60951	0.02811
--	--	--	--	--
15	5	1.53499	1.31086	-0.17725
15	10	1.02837	1.53142	0.23418
15	15	0.85277	0.74501	0.45412
15	20	0.2076	0.84525	0.10919
15	25	0.15707	0.55303	-0.35473
15	30	0.82939	-0.92662	0.15972
--	--	--	--	--
20	5	1.19434	1.21267	0.39779
20	10	2.37203	1.70489	0.61905
20	15	1.42214	0.70442	0.88963
20	20	0.90211	0.6406	1.09353
20	25	0.45115	0.28155	1.13515
20	30	0.97202	-1.0591	0.74056
--	--	--	--	--
25	5	0.22867	0.67188	0.10361
25	10	2.81174	0.81968	1.19859
25	15	2.2805	0.36456	1.37333
25	20	1.58405	0.35803	1.69927
25	25	1.63495	-0.29196	1.7987
25	30	1.88799	-0.43565	1.21171
--	--	--	--	--
29	5	-0.1974	0.2274	0.36288
29	10	0.06261	0.00899	0.13208
29	15	0.88287	0.0293	0.97523
29	20	0.74945	0.14138	0.21728
29	25	-0.18446	-0.08713	-0.36738
29	30	0.1037	0.02712	0.15706

## Sheet: x=160
y	z	u	v	w
1	5	2.33436	-0.15948	-0.35539
1	10	0.13281	-0.04181	0.14272
1	15	0.87346	-0.17462	0.82807
1	20	0.12494	-0.03347	0.04452
1	25	1.18297	-0.17148	0.75066
1	30	0.116	-0.14063	0.07228
--	--	--	--	--
5	5	1.53328	0.07556	-0.04066
5	10	0.99145	0.97599	0.07372
5	15	1.03817	0.09673	0.8446
5	20	0.75742	-0.05816	0.55965
5	25	0.86398	-0.48228	0.75088
5	30	0.5593	-0.89603	0.37959
--	--	--	--	--
10	5	2.02415	0.90141	0.01429
10	10	1.47003	1.27287	-0.04166
10	15	0.44998	0.89513	0.00486
10	20	0.5891	1.0393	0.04204
10	25	0.2848	0.03764	-0.61446
10	30	0.52743	-0.60951	0.02811
--	--	--	--	--
15	5	1.53499	1.31086	-0.17725
15	10	1.02837	1.53142	0.23418
15	15	0.85277	0.74501	0.45412
15	20	0.2076	0.84525	0.10919
15	25	0.15707	0.55303	-0.35473
15	30	0.82939	-0.92662	0.15972
--	--	--	--	--
20	5	1.19434	1.21267	0.39779
20	10	2.37203	1.70489	0.61905
20	15	1.42214	0.70442	0.88963
20	20	0.90211	0.6406	1.09353
20	25	0.45115	0.28155	1.13515
20	30	0.97202	-1.0591	0.74056
--	--	--	--	--
25	5	0.22867	0.67188	0.10361
25	10	2.81174	0.81968	1.19859
25	15	2.2805	0.36456	1.37333
25	20	1.58405	0.35803	1.69927
25	25	1.63495	-0.29196	1.7987
25	30	1.88799	-0.43565	1.21171
--	--	--	--	--
29	5	-0.1974	0.2274	0.36288
29	10	0.06261	0.00899	0.13208
29	15	0.88287	0.0293	0.97523
29	20	0.74945	0.14138	0.21728
29	25	-0.18446	-0.08713	-0.36738
29	30	0.1037	0.02712	0.15706

[truncated: 2 more sheets: x=175, x=185]
