# Supplementary material for: Hydrodynamics of an in-pond raceway system with an aeration plug-flow device for application in aquaculture: an experimental study
Source: R Soc Open Sci. 2019 Jul 10;6(7):182061. doi: 10.1098/rsos.182061 (PMC6689605; doi:10.1098/rsos.182061)
Supplement: Experimental Data [file rsos182061supp1.xlsx]

## Sheet: z=5
x	y	z	u	v	w		u'v'	u'w'	v'w'		k
-40	0	5	0.20402	0.85754	0.59219		0.05007	0.10239	0.0849		0.13775
-40	5	5	0.78068	1.22298	-0.30881		0.04648	0.08544	0.05845		0.10359
-40	10	5	0.97508	1.05542	0.66386		0.01087	0.03054	0.01727		0.03694
-40	15	5	1.4876	0.91795	0.67457		0.0184	0.07786	0.04839		0.12289
-40	20	5	1.3464	0.26657	0.53291		0.02827	0.10938	0.04512		0.12739
-40	25	5	0.7385	-0.1917	0.17859		0.28557	1.41911	0.39751		1.53743
-40	30	5	1.16193	0.32057	0.77394		0.20355	0.97766	0.30503		1.09048
--	--	--	--	--	--		--	--	--
5	0	5	-0.51006	0.00801	0.44796		0.15528	0.77931	0.19851		0.8227
5	5	5	-1.81119	1.77536	2.64661		4.38749	7.22076	5.11341		8.85907
5	10	5	-2.32894	1.6609	-0.90812		6.03224	9.60005	7.51237		12.1923
5	15	5	-1.91622	2.76968	-0.02998		3.72412	6.13853	4.02624		7.37853
5	20	5	-2.43578	2.40577	0.81037		3.28325	4.457	2.96017		5.57124
5	25	5	-3.77415	1.65718	1.1786		3.79824	4.27918	3.25915		5.77584
5	30	5	-4.47653	0.22016	0.62879		1.63167	3.61917	1.09897		4.15328
--	--	--	--	--	--		--	--	--
20	0	5	-0.08153	0.0749	0.73574		0.31659	1.47808	0.39687		1.5585
20	5	5	1.05539	2.8981	3.74535		7.65625	12.4118	7.95121		14.8731
20	10	5	-1.12681	3.29362	0.03566		6.23853	9.27031	7.03351		11.7037
20	15	5	-1.31032	2.97575	0.77001		4.61997	6.64898	5.06358		8.43614
20	20	5	-3.25934	3.37617	1.22336		4.83975	8.04712	4.68889		9.46117
20	25	5	-3.15748	2.37431	1.48818		4.28974	5.62253	4.22622		7.23537
20	30	5	-2.55366	0.21822	1.14272		0.39164	1.36978	0.36402		1.42549
--	--	--	--	--	--		--	--	--
40	0	5	0.61359	-0.01656	0.10909		0.32527	1.72576	0.30591		1.75785
40	5	5	3.74382	2.25642	3.67587		10.8279	18.6424	10.9178		21.8137
40	10	5	-1.62895	2.7916	-0.26923		7.57293	9.02634	7.05608		12.0089
40	15	5	-2.70351	2.54756	-0.01968		6.01069	8.66734	6.34754		10.8812
40	20	5	-3.84502	2.53244	1.14949		4.83647	6.77392	5.26648		8.6786
40	25	5	-4.59067	1.77445	0.85259		3.47042	4.90359	3.54553		6.15935
40	30	5	-0.73457	0.04832	0.32549		0.05612	0.31791	0.04945		0.32483
--	--	--	--	--	--		--	--	--
60	0	5	0.90774	-0.06158	0.07954		0.22183	1.376	0.18803		1.41
60	5	5	6.02855	1.86763	2.99332		11.065	21.0115	10.3808		23.7876
60	10	5	0.50195	2.95519	-1.18106		6.6707	8.78673	7.06501		11.483
60	15	5	-0.56809	2.7261	-0.1527		5.34577	7.54167	4.7173		9.27262
60	20	5	-1.87382	2.1228	-0.20491		4.49017	6.34726	4.58128		7.96898
60	25	5	-3.10215	0.9758	0.90462		2.89107	3.91987	3.1917		5.11607
60	30	5	-3.58155	0.25339	1.29963		2.05398	4.57695	1.80493		5.02023
--	--	--	--	--	--		--	--	--
80	0	5	0.43691	0.04738	0.36055		0.08376	0.51523	0.10233		0.53392
80	5	5	6.45159	1.20803	2.51112		9.44734	18.3385	9.43781		20.7695
80	10	5	1.11953	1.9524	-0.76461		5.68657	7.37685	5.74449		9.59135
80	15	5	-0.5756	1.96579	-0.76236		5.28479	7.08294	4.97709		8.95246
80	20	5	-0.76953	2.31603	0.39617		5.27874	7.63548	4.26781		9.28393
80	25	5	-1.52395	1.43021	0.8867		3.05354	4.04708	2.82752		5.12574
80	30	5	-2.03437	0.41728	1.27934		1.98099	3.93935	1.58332		4.43677
--	--	--	--	--	--		--	--	--
100	0	5	0.75463	-0.0708	-0.15074		0.2085	1.21296	0.219		1.23325
100	5	5	5.85817	1.05477	1.51733		6.68975	14.0852	6.67864		15.6712
100	10	5	2.17438	1.8974	-0.58833		4.75715	6.77697	4.36285		8.33363
100	15	5	2.12294	2.37594	-0.38637		4.36745	6.47177	4.23246		7.90309
100	20	5	0.34476	1.44982	0.72101		2.81383	3.6784	2.55211		4.67208
100	25	5	0.1325	0.9233	0.72554		2.74796	3.79644	2.47597		4.71317
100	30	5	-0.44248	0.11014	0.68601		0.2362	0.75856	0.17309		0.82246
--	--	--	--	--	--		--	--	--
120	0	5	1.12832	-0.00267	-0.0322		0.32389	1.30076	0.31548		1.34048
120	5	5	2.79185	0.51255	0.6841		3.4629	6.39832	3.02952		7.27542
120	10	5	2.43006	1.54199	-0.74874		5.49211	7.07092	4.1965		8.95817
120	15	5	1.03703	1.72126	-0.24339		2.10395	3.42327	2.19529		4.10098
120	20	5	1.03373	1.95353	0.46065		3.01189	4.42678	3.39521		5.6136
120	25	5	0.18833	1.67223	0.75722		2.30063	3.48637	2.28392		4.24003
120	30	5	-0.66355	0.30125	0.54763		1.01388	2.14116	0.75784		2.41193
--	--	--	--	--	--		--	--	--
140	0	5	2.33436	-0.15948	-0.35539		1.44078	3.76771	1.37176		4.03453
140	5	5	1.53328	0.07556	-0.04066		1.27549	2.59867	1.20537		2.89863
140	10	5	2.02415	0.90141	0.01429		2.14311	2.48994	1.73115		3.2919
140	15	5	1.53499	1.31086	-0.17725		2.71332	3.7771	2.40744		4.66885
140	20	5	1.19434	1.21267	0.39779		1.78969	2.42423	1.57844		3.02602
140	25	5	0.22867	0.67188	0.10361		1.14528	1.87528	1.00135		2.19799
140	30	5	-0.1974	0.2274	0.36288		1.4348	3.47456	1.09587		3.82775
--	--	--	--	--	--		--	--	--
160	0	5	0.15614	-0.05751	-0.39479		0.01229	0.07309	0.0161		0.07712
160	5	5	0.95099	-0.01625	0.00315		0.68462	1.20953	0.62674		1.39163
160	10	5	1.58318	0.86104	-0.18091		1.39983	1.93714	1.38457		2.43752
160	15	5	1.60955	1.2259	-0.14494		1.2966	1.70228	1.36515		2.22445
160	20	5	1.37265	0.48268	0.27642		1.17114	1.68642	1.10319		2.07249
160	25	5	1.93583	0.81831	0.33768		1.55515	2.13882	1.10543		2.66651
160	30	5	0.61504	0.04706	-0.7431		0.10896	0.51978	0.12365		0.5369
--	--	--	--	--	--		--	--	--
175	0	5	0.20949	-0.10304	-0.23535		0.11167	0.46644	0.15639		0.51187
175	5	5	0.29148	0.21032	0.38114		0.36387	0.83799	0.52294		1.00724
175	10	5	0.8083	0.86742	-0.15111		0.99698	1.37974	0.86458		1.70614
175	15	5	1.87924	0.47898	0.34647		1.15104	1.73143	0.99662		2.0807
175	20	5	1.5043	0.66872	0.5575		1.24281	1.5382	1.13623		2.0034
175	25	5	2.01776	0.30057	0.46153		0.93748	1.57084	0.91479		1.84429
175	30	5	0.34325	0.18158	1.52649		0.06457	0.32956	0.12274		0.41192
--	--	--	--	--	--		--	--	--
185	0	5	-0.03559	-1.10421	0.00378		0.18706	0.28648	0.3285		0.44036
185	5	5	1.38226	-1.36594	0.43381		0.46078	0.7724	0.46794		0.91207
185	10	5	1.14076	0.28281	0.11623		0.55696	0.70697	0.47788		0.90351
185	15	5	1.23876	0.32815	1.09541		0.72631	1.86666	1.36751		2.51904
185	20	5	1.34368	0.20829	0.4589		0.7769	1.2607	0.84536		1.52568
185	25	5	-0.15686	0.29538	0.58728		0.10409	0.36711	0.23103		0.52287
185	30	5	-0.34695	0.32419	-0.1311		0.13723	0.59022	0.33299		0.8764
											--
											--
											--
											--
											--
											--
											--
											--
											--
											--
											--
											--
											--
											--
											--
											--
											--
											--
											--
											--
											--
											--
											--
											--

## Sheet: z=10
x	y	z	u	v	w		u'v'	u'w'	v'w'		k
-40	0	10	-0.16979	0.5456	0.10077		0.06303	0.22701	0.09192		0.25611
-40	5	10	1.38041	1.6951	0.14101		0.11965	0.22823	0.20263		0.31375
-40	10	10	1.53405	1.45279	0.4083		0.12483	0.21739	0.17788		0.28224
-40	15	10	2.15137	0.89328	0.4393		0.05147	0.14379	0.1045		0.20008
-40	20	10	1.91547	0.27407	0.70192		0.01562	0.10059	0.03238		0.13103
-40	25	10	1.31673	-0.31833	0.16154		0.08497	0.45258	0.1408		0.52476
-40	30	10	0.84702	-0.17521	0.27902		0.06331	0.30597	0.10682		0.35984
--	--	--	--	--	--		--	--	--
5	0	10	-0.64581	-0.0257	2.32377		0.86888	4.02114	1.14062		4.29416
5	5	10	-1.70252	-0.26481	2.92432		6.40473	9.58887	7.0907		12.0066
5	10	10	-2.8546	-0.17343	1.26151		5.16718	7.37727	4.87452		9.09692
5	15	10	-2.634	0.00666	-0.49917		5.78725	6.90281	5.22609		9.1295
5	20	10	-1.72285	0.57964	2.91589		3.69572	5.01372	3.70782		6.38031
5	25	10	-2.66372	0.68077	3.17645		4.22779	4.93752	4.3108		6.78403
5	30	10	-2.51309	0.00166	1.67304		0.88436	2.56747	0.71001		2.7519
--	--	--	--	--	--		--	--	--
20	0	10	0.51754	0.0497	2.2847		0.21923	1.71326	0.38825		2.02563
20	5	10	0.46966	-0.36096	3.78456		11.4056	14.1371	11.6656		18.8465
20	10	10	-3.10502	-0.88428	1.6315		6.97244	9.87866	7.98452		12.7873
20	15	10	-3.26751	0.30184	0.77261		6.96692	9.05932	6.17422		11.4996
20	20	10	-2.7038	0.97672	2.30632		6.86801	8.60841	5.84448		11.0522
20	25	10	-3.5732	0.90597	3.51393		4.72152	5.60166	4.33877		7.45021
20	30	10	-1.71611	0.00388	1.38076		0.3362	1.4085	0.31434		1.4492
--	--	--	--	--	--		--	--	--
40	0	10	0.53995	-0.0547	-0.06328		0.0949	1.19035	0.15345		1.33656
40	5	10	1.37868	1.80755	-2.25889		13.78	18.1404	15.5217		24.1644
40	10	10	-2.69292	0.36778	-0.06667		8.24719	13.2587	9.59441		16.3947
40	15	10	-4.22944	0.33404	1.15166		8.14655	11.3767	8.62378		14.4828
40	20	10	-4.95768	-0.04705	0.53301		5.7358	7.69848	7.41638		10.7169
40	25	10	-4.34958	0.41365	2.48711		4.67086	6.67507	5.50766		8.6929
40	30	10	-1.23299	-0.09963	0.22931		0.17269	0.90825	0.21952		0.95539
--	--	--	--	--	--		--	--	--
60	0	10	2.20409	-0.01976	0.71269		0.81707	4.06267	0.98802		4.23555
60	5	10	3.8069	1.5757	-2.66404		12.8727	16.9198	13.5499		22.0965
60	10	10	1.16045	1.62409	-1.12153		10.38	17.9233	12.8477		22.0528
60	15	10	-0.62639	1.80366	-0.87196		7.64959	11.926	10.1148		15.6383
60	20	10	-2.08186	0.9473	-0.34627		5.45385	8.90082	7.3735		11.5676
60	25	10	-2.75721	0.72351	1.66609		4.8592	6.76376	5.28905		8.68795
60	30	10	-3.61071	0.17337	3.367		2.69896	8.65786	2.97878		9.16432
--	--	--	--	--	--		--	--	--
80	0	10	0.74816	-0.01737	-0.45712		0.14955	2.04071	0.26533		2.39512
80	5	10	5.03601	1.6682	-2.97124		11.8904	13.8133	10.4734		18.4324
80	10	10	3.15105	1.41652	-1.31099		10.8526	16.6935	11.6308		20.5142
80	15	10	1.46303	2.15939	-0.70134		7.13973	10.7469	8.16607		13.5566
80	20	10	0.14807	1.73899	0.42147		6.57214	7.95737	7.2186		10.9734
80	25	10	-0.78787	0.68685	1.9532		4.60984	6.79331	4.77085		8.41603
80	30	10	-0.27995	0.04993	1.09155		0.53489	1.98696	0.50512		2.0582
--	--	--	--	--	--		--	--	--
100	0	10	0.66182	-0.06221	-0.10844		0.1351	1.02292	0.13681		1.03203
100	5	10	5.87624	1.58081	-1.70904		7.447	11.2438	7.6537		13.7826
100	10	10	3.31076	2.20399	-0.58984		7.53685	12.4634	8.86606		15.3089
100	15	10	2.00967	1.38649	0.04292		6.7031	9.69547	8.27798		12.7737
100	20	10	0.62243	1.23903	1.26883		4.86012	6.43472	5.1493		8.3901
100	25	10	0.43154	1.00438	2.48689		4.62155	7.12508	5.08839		8.80834
100	30	10	-0.19603	-0.01955	1.0477		0.45023	1.71907	0.39997		1.7835
--	--	--	--	--	--		--	--	--
120	0	10	0.81349	-0.02663	0.06512		0.20194	1.18539	0.24663		1.23017
120	5	10	2.93594	1.45972	-0.56353		5.35542	8.25267	3.9373		9.92374
120	10	10	3.1852	2.15962	-0.50008		5.56621	9.17841	5.17853		10.7726
120	15	10	2.45541	1.92568	-0.09081		5.27721	7.71231	5.80514		9.7335
120	20	10	1.94829	1.76041	1.00869		3.85556	5.21216	4.32865		6.84811
120	25	10	2.44838	1.15659	1.65225		3.08127	5.20545	3.10404		6.12428
120	30	10	0.21904	-0.13242	-0.52055		0.05725	0.45383	0.0869		0.49942
--	--	--	--	--	--		--	--	--
140	0	10	0.13281	-0.04181	0.14272		0.04126	0.22567	0.0519		0.23638
140	5	10	0.99145	0.97599	0.07372		1.47925	2.92627	1.92114		3.51238
140	10	10	1.47003	1.27287	-0.04166		2.44875	3.52396	2.36992		4.34926
140	15	10	1.02837	1.53142	0.23418		2.26169	3.50992	2.17074		4.21225
140	20	10	2.37203	1.70489	0.61905		2.56042	4.17431	2.88274		5.08779
140	25	10	2.81174	0.81968	1.19859		2.1785	2.80141	2.03636		3.59957
140	30	10	0.06261	0.00899	0.13208		0.00354	0.03566	0.00553		0.03954
--	--	--	--	--	--		--	--	--
160	0	10	0.00181	-0.05432	0.03626		0.05725	0.28823	0.09371		0.33324
160	5	10	0.53577	1.16781	-0.19893		0.50756	0.91308	0.6688		1.13393
160	10	10	0.62735	0.57117	-0.1315		0.6014	0.82249	0.76686		1.12727
160	15	10	0.74233	0.6871	0.0194		0.71582	1.08428	0.8391		1.37497
160	20	10	2.15925	0.73412	0.66013		1.44718	2.04836	1.62281		2.63508
160	25	10	3.16812	0.46464	1.05625		1.13013	1.44388	1.07425		1.86615
160	30	10	1.02698	0.06311	0.80723		0.05748	0.29572	0.05742		0.3013
--	--	--	--	--	--		--	--	--
175	0	10	-0.07825	-0.04705	-1.34146		0.03955	0.22964	0.08288		0.30256
175	5	10	0.91583	0.6607	0.3453		0.70274	1.1295	0.86348		1.42216
175	10	10	1.01663	0.87978	0.15705		0.66314	0.96464	0.75739		1.23351
175	15	10	1.2721	0.37386	0.75707		0.7581	0.75737	0.72491		1.12093
175	20	10	2.06494	-0.11115	1.14038		1.10158	1.31089	0.99499		1.73574
175	25	10	2.31272	-0.31302	0.99988		0.91638	1.49547	0.76047		1.75455
175	30	10	1.51178	-0.13837	0.74743		0.37683	1.23577	0.39289		1.29675
--	--	--	--	--	--		--	--	--
185	0	10	-0.1906	-0.60003	-0.43624		0.09411	0.17739	0.19372		0.27704
185	5	10	2.24395	0.29779	0.00225		0.30842	0.83835	0.55196		1.08591
185	10	10	2.06145	0.35649	0.29349		0.31121	0.3689	0.42007		0.5628
185	15	10	2.37654	0.12579	1.0851		0.52426	0.67827	0.60433		0.91868
185	20	10	3.06027	-0.1257	0.87778		0.64663	0.67631	0.6736		0.99889
185	25	10	-0.13382	0.09096	0.87593		0.35569	0.71824	0.63101		0.99577
185	30	10	-0.22215	0.09506	0.31224		0.16275	0.49726	0.29077		0.63094
--	--	--	--	--	--						--
-30	0	30	0	0	0						--
-30	5	30	0	0	0						--
-30	10	30	0	0	0						--
-30	15	30	0	0	0						--
-30	20	30	0	0	0						--
-30	25	30	0	0	0						--
-30	30	30	0	0	0						--
											--
											--
											--
											--
											--
											--
											--
											--
											--
											--
											--
											--
											--
											--
											--
											--

## Sheet: z=15
x	y	z	u	v	w		u'v'	u'w'	v'w'		k
-40	0	15	0.08808	-0.368	0.3863		0.56264	0.89292	0.83568		1.22699
-40	5	15	1.44845	1.0148	-0.67271		0.83844	1.55696	1.20524		1.98513
-40	10	15	1.65732	1.10098	0.38044		0.32284	0.42201	0.35736		0.56088
-40	15	15	1.4421	0.58155	0.12126		0.05406	0.1412	0.09529		0.18274
-40	20	15	1.9902	0.31235	0.61144		0.03161	0.11534	0.07245		0.16726
-40	25	15	1.04035	-0.15083	0.37558		0.15929	1.05792	0.26823		1.22505
-40	30	15	0.75146	0.08292	-0.07243		0.04662	0.29242	0.09212		0.37025
--	--	--	--	--	--		--	--	--
5	0	15	-0.72829	-0.01069	2.89438		2.17869	7.7632	2.53792		8.20992
5	5	15	-2.19333	-0.61134	1.84439		8.29758	12.8026	9.63914		16.0703
5	10	15	-4.41583	-0.89808	0.61092		4.74204	7.0982	5.74735		9.14961
5	15	15	-4.09601	-1.22534	1.36977		6.17137	8.21382	5.88143		10.4328
5	20	15	-2.74133	-0.86852	2.21066		4.6352	6.52994	4.27236		8.06799
5	25	15	-4.32702	-0.14214	3.09187		3.288	4.74291	2.97508		5.79788
5	30	15	-1.08278	-0.04581	1.18068		0.21829	0.95053	0.23008		0.97827
--	--	--	--	--	--		--	--	--
20	0	15	1.8411	-0.07856	3.07947		1.26529	6.12475	1.45738		6.33656
20	5	15	1.6125	-1.51386	3.71188		14.786	19.0633	13.8226		24.4672
20	10	15	-4.6149	-1.96285	-0.5046		5.6602	8.76616	6.24464		10.8246
20	15	15	-4.95299	-1.41444	0.22421		4.91129	6.64533	4.57098		8.35158
20	20	15	-3.41499	-1.28995	1.50735		4.95905	7.31267	4.8038		8.94521
20	25	15	-4.92728	-0.72095	3.43985		4.44528	6.52303	4.4935		8.05451
20	30	15	-3.74367	-0.22453	2.36934		1.2411	4.97149	1.24435		5.12683
--	--	--	--	--	--		--	--	--
40	0	15	3.36017	0.00295	2.52323		1.69644	6.69949	1.68396		6.91288
40	5	15	5.25309	-0.39608	4.43349		18.3716	24.8141	16.1344		30.9962
40	10	15	-2.94698	-1.00272	-0.94436		9.56685	13.715	10.1773		17.2908
40	15	15	-4.67809	-1.06452	-0.57859		6.69131	10.1926	7.54463		12.7426
40	20	15	-5.47186	-0.86447	-0.24819		6.2325	7.94076	7.87013		11.2464
40	25	15	-4.92182	-0.74878	1.90474		5.06193	8.16949	6.86663		10.6796
40	30	15	-3.74129	-0.03139	2.1078		0.91371	3.44346	1.00211		3.59111
--	--	--	--	--	--		--	--	--
60	0	15	8.36812	-0.52293	5.56117		7.28153	21.6661	6.58238		22.8827
60	5	15	7.27694	-0.61945	5.52025		17.4313	21.8745	15.733		28.2581
60	10	15	1.04968	0.21193	-2.02703		14.9564	19.5303	16.8801		26.1369
60	15	15	-1.65288	0.54275	-2.22174		7.27764	11.0849	8.60119		14.0635
60	20	15	-2.33674	1.12516	-0.9897		6.13761	8.95601	6.96702		11.4153
60	25	15	-3.14323	0.28783	2.16291		4.47675	6.23273	5.39583		8.27952
60	30	15	-2.57974	-0.0041	5.0625		2.24109	6.72552	2.41823		7.14789
--	--	--	--	--	--		--	--	--
80	0	15	1.12237	-0.02404	0.67853		0.27091	2.02217	0.25583		2.04262
80	5	15	8.56851	-0.33754	4.9115		13.7362	17.1294	12.2184		22.146
80	10	15	1.47081	0.68798	-1.8646		11.2252	14.1578	11.6279		18.7763
80	15	15	0.11567	0.78641	-0.24067		8.37483	12.7349	10.4841		16.5049
80	20	15	-0.76534	1.74476	0.22338		6.41288	8.72121	7.76377		11.7355
80	25	15	-1.77097	-0.24378	3.16348		6.24436	8.91083	6.67546		11.2696
80	30	15	-1.52617	0.000679295	3.3362		1.86627	6.04032	1.63122		6.34713
--	--	--	--	--	--		--	--	--
100	0	15	5.33999	-0.14492	2.58337		3.96947	12.609	3.32988		13.3283
100	5	15	6.03834	-0.0814	3.11633		10.274	13.8628	8.57275		17.2673
100	10	15	1.79247	1.37476	-0.8647		10.1327	13.824	9.36729		17.2997
100	15	15	-0.03382	0.79935	0.19865		6.43962	8.60793	7.11974		11.3145
100	20	15	-0.83582	0.38069	1.36388		5.08357	7.19762	6.4531		9.68224
100	25	15	-0.06176	0.32979	2.80469		4.9847	6.86135	5.78552		9.0392
100	30	15	-0.8175	-0.08199	1.57246		0.70051	2.9529	0.84365		3.10415
--	--	--	--	--	--		--	--	--
120	0	15	1.75334	-0.04292	1.54975		1.30814	4.93214	1.13325		5.1333
120	5	15	2.5355	0.35721	1.20261		4.86016	7.44672	3.77223		8.91809
120	10	15	1.27109	1.46223	-0.27946		5.99664	8.13214	5.48182		10.1861
120	15	15	0.53535	1.44753	0.22322		3.30872	4.90687	4.16983		6.4446
120	20	15	1.0835	1.13169	0.81735		3.42082	4.23657	4.26077		6.05929
120	25	15	1.88049	0.4895	2.71101		3.79925	5.06621	4.0788		6.60837
120	30	15	1.68315	0.01524	3.38966		1.39229	4.58603	1.18282		4.82667
--	--	--	--	--	--		--	--	--
140	0	15	0.87346	-0.17462	0.82807		0.81427	2.30591	0.75933		2.4456
140	5	15	1.03817	0.09673	0.8446		1.42778	2.94996	1.24644		3.27885
140	10	15	0.44998	0.89513	0.00486		1.16291	1.78907	1.29783		2.22166
140	15	15	0.85277	0.74501	0.45412		1.84508	2.16396	1.92153		2.98493
140	20	15	1.42214	0.70442	0.88963		2.12852	3.34698	2.62766		4.25706
140	25	15	2.2805	0.36456	1.37333		2.17549	2.96974	2.15184		3.75808
140	30	15	0.88287	0.0293	0.97523		0.21559	0.78629	0.20715		0.81531
--	--	--	--	--	--		--	--	--
160	0	15	-0.20245	-0.02508	0.70943		0.10492	0.41647	0.1285		0.44124
160	5	15	0.874	-0.20796	0.75349		0.80652	1.11658	0.69981		1.38058
160	10	15	0.73511	0.73266	0.07197		1.35155	1.63044	1.48441		2.25287
160	15	15	1.27536	1.03598	1.13988		1.71451	2.20727	1.6732		2.85776
160	20	15	1.65387	0.61024	1.00836		1.63185	2.0359	1.6572		2.7003
160	25	15	2.59129	0.17366	1.62731		1.765	2.45998	1.71699		3.07688
160	30	15	1.5856	0.01392	0.48799		0.2349	0.73474	0.21433		0.77209
--	--	--	--	--	--		--	--	--
175	0	15	0.40531	0.01276	1.01723		0.15953	0.51713	0.21628		0.57463
175	5	15	0.6433	0.49583	0.94141		0.59219	1.19819	0.78556		1.44046
175	10	15	1.29628	0.43507	0.07494		0.83012	1.06571	0.8391		1.39257
175	15	15	1.0475	0.11294	0.38107		0.95537	1.28049	1.14008		1.72585
175	20	15	3.0631	0.11671	2.5266		1.17286	1.48975	1.15862		1.94594
175	25	15	2.59884	-0.46111	2.15574		1.29734	2.37077	1.47733		2.79502
175	30	15	0.2895	0.0037	0.77498		0.03305	0.23349	0.05825		0.27613
--	--	--	--	--	--		--	--	--
185	0	15	0.33287	-0.18558	-0.32683		0.18706	0.28648	0.3285		0.99131
185	5	15	2.03897	0.39073	-0.67274		0.46078	0.7724	0.46794		0.9304
185	10	15	2.0949	0.41868	0.35476		0.55696	0.70697	0.47788		0.76434
185	15	15	2.26205	-0.04686	1.05666		0.72631	1.86666	1.36751		1.02422
185	20	15	3.10637	-0.60915	1.12803		0.7769	1.2607	0.84536		1.06282
185	25	15	-0.21138	-0.11597	0.000242718		0.10409	0.36711	0.23103		1.57806
185	30	15	-0.1926	-0.05357	0.17003		0.13723	0.59022	0.33299		1.1868
--	--	--	--	--	--
-29.6	0	30	0	0	0
-29.6	5	30	0	0	0
-29.6	10	30	0	0	0
-29.6	15	30	0	0	0
-29.6	20	30	0	0	0
-29.6	25	30	0	0	0
-29.6	30	30	0	0	0

## Sheet: z=20
x	y	z	u	v	w		u'v'	u'w'	v'w'		k
-40	0	20	0.22041	-0.71647	0.40679		0.71156	1.10958	1.02578		1.51353
-40	5	20	0.49683	0.27364	-0.46986		1.0812	1.88061	1.22979		2.24974
-40	10	20	0.63503	0.77578	0.14468		0.71763	1.37639	0.76804		1.57979
-40	15	20	1.32215	0.39314	-0.14268		0.03358	0.09387	0.06551		0.12733
-40	20	20	1.46278	0.32984	0.06819		0.05357	0.12059	0.08964		0.15683
-40	25	20	1.14675	0.19167	0.03188		0.11179	0.21878	0.18037		0.29038
-40	30	20	0.70212	-0.01967	0.01013		0.23308	1.33514	0.3505		1.4784
--	--	--	--	--	--		--	--	--
5	0	20	-0.30174	-0.07309	1.61057		0.30012	2.47979	0.44901		2.71093
5	5	20	-2.31556	-1.44561	1.77784		18.0996	21.6619	19.6115		29.9248
5	10	20	-6.73732	-3.15464	1.73557		7.91003	9.43929	9.76584		13.7416
5	15	20	-5.90657	-4.71669	2.23125		5.97561	9.54025	7.21696		11.9709
5	20	20	-4.19966	-1.55541	2.75204		4.20563	5.26543	4.17787		6.93403
5	25	20	-4.22175	-1.07766	2.91795		2.89143	5.0384	3.08174		5.93291
5	30	20	-0.8952	-0.087	0.68897		0.08214	0.58806	0.13303		0.66702
--	--	--	--	--	--		--	--	--
20	0	20	1.44753	0.03724	1.20055		0.45202	2.78901	0.595		2.94322
20	5	20	2.96855	-2.03349	3.96804		18.661	23.7543	16.9489		30.5218
20	10	20	-3.12681	-1.92806	1.17455		13.2402	17.1884	12.1398		21.9288
20	15	20	-5.22721	-2.69702	0.83002		5.01052	7.01745	5.54265		9.03198
20	20	20	-5.18241	-1.84593	2.36739		3.96315	5.99147	4.40288		7.48084
20	25	20	-5.81448	-1.51582	3.03306		4.25307	8.26983	4.82911		9.57841
20	30	20	-2.3379	-0.11194	0.45678		0.43679	2.4238	0.53739		2.52447
--	--	--	--	--	--		--	--	--
40	0	20	0.74695	-0.02181	0.11552		0.14486	1.01181	0.14947		1.02301
40	5	20	8.32216	-1.33428	4.9807		20.8902	24.4191	19.5752		32.8439
40	10	20	-0.10289	-0.71621	-1.42442		15.6845	18.9206	18.2105		26.6798
40	15	20	-5.47308	-3.44012	-0.21908		6.86149	10.3975	8.50779		13.4461
40	20	20	-5.48404	-2.08375	-0.41169		6.34423	8.34496	7.50786		11.3175
40	25	20	-5.12899	-1.6001	0.01336		5.09674	11.837	7.71198		14.5272
40	30	20	-0.37327	0.0467	0.34433		0.03386	0.29779	0.05813		0.34566
--	--	--	--	--	--		--	--	--
60	0	20	1.43639	-0.06939	0.54515		0.27687	1.70524	0.23759		1.74453
60	5	20	8.20759	-0.98912	5.71628		20.6272	23.5144	16.3838		31.3269
60	10	20	3.4213	-0.19606	-2.18783		16.7154	20.499	16.9068		27.3935
60	15	20	-0.80701	0.13763	-2.02748		9.96151	13.3066	10.3954		17.2098
60	20	20	-3.22889	-0.83394	-1.31158		5.40858	7.53789	6.62669		10.0713
60	25	20	-3.34544	-0.27377	1.39497		4.75835	6.62396	5.20155		8.51853
60	30	20	-0.87957	-0.00368	0.66973		0.15285	0.68584	0.16533		0.70638
--	--	--	--	--	--		--	--	--
80	0	20	2.13917	-0.39228	-1.38578		0.68336	4.29242	0.79298		4.40314
80	5	20	8.32642	-0.97192	4.06365		14.9107	18.6173	12.7022		23.9436
80	10	20	2.1696	-0.07951	-1.32394		15.5547	17.3176	15.589		24.3186
80	15	20	-1.4995	0.51549	-0.58218		7.88268	10.0658	7.91881		13.1665
80	20	20	-2.25952	0.54407	0.15972		5.22751	6.36576	5.86595		8.8166
80	25	20	-1.988	-0.28063	2.78239		5.3823	7.44925	5.88663		9.60578
80	30	20	-0.97262	0.00237	1.66252		0.4193	1.65025	0.45962		1.7156
--	--	--	--	--	--		--	--	--
100	0	20	0.87572	0.0654	0.63141		0.17957	1.083	0.15602		1.10665
100	5	20	5.2107	-0.54915	1.84446		10.5892	13.4411	9.29976		17.2178
100	10	20	1.27897	0.69573	0.01051		10.9721	13.7319	9.69177		17.7098
100	15	20	-0.23451	1.20272	0.04279		7.11236	7.96162	7.11262		11.1386
100	20	20	-1.49341	0.07123	1.65232		4.51433	5.22481	4.83541		7.32609
100	25	20	-1.19996	-0.15833	2.99847		4.30115	6.10587	4.37547		7.64787
100	30	20	-0.50092	0.02325	1.07265		0.31973	1.26838	0.36605		1.32615
--	--	--	--	--	--		--	--	--
120	0	20	0.85196	-0.05255	0.45807		0.27576	1.15034	0.25323		1.18487
120	5	20	2.75545	-0.07071	0.92926		5.30974	7.2032	4.27172		8.94871
120	10	20	0.4021	1.31913	-0.24479		4.10304	5.57739	4.36578		7.19399
120	15	20	-0.18699	0.65718	-0.27061		4.06181	4.9019	4.78948		6.95294
120	20	20	-0.22551	0.4997	1.27213		4.37902	5.53122	4.4449		7.29133
120	25	20	0.45821	0.37254	2.5033		3.3832	5.15148	3.49378		6.3014
120	30	20	0.02378	0.01474	0.52097		0.00241	0.06526	0.01874		0.25876
--	--	--	--	--	--		--	--	--
140	0	20	0.12494	-0.03347	0.04452		0.02936	0.1183	0.03327		0.12335
140	5	20	0.75742	-0.05816	0.55965		1.43731	1.8679	1.55597		2.47242
140	10	20	0.5891	1.0393	0.04204		1.30321	2.0175	1.34317		2.45223
140	15	20	0.2076	0.84525	0.10919		1.13378	1.79653	1.2961		2.22162
140	20	20	0.90211	0.6406	1.09353		2.58903	3.11109	2.79983		4.28563
140	25	20	1.58405	0.35803	1.69927		2.10947	2.78664	2.38413		3.70992
140	30	20	0.74945	0.14138	0.21728		0.08819	0.45785	0.11312		0.483
--	--	--	--	--	--		--	--	--
160	0	20	0.12731	-0.00977	0.01384		0.00677	0.03934	0.00761		0.04026
160	5	20	0.6479	-0.33424	0.38101		0.54141	0.68067	0.47011		0.87443
160	10	20	0.78697	0.44926	-0.12566		0.85264	1.06532	0.72163		1.36895
160	15	20	0.60369	0.09402	0.34331		0.74772	1.38807	1.23365		1.89801
160	20	20	1.4639	0.16959	0.98543		1.52862	1.95287	1.86823		2.72349
160	25	20	2.05984	0.11188	1.43092		1.44844	2.08429	1.512		2.61158
160	30	20	0.01578	0.02369	0.13776		0.00105	0.02193	0.00444		0.04925
--	--	--	--	--	--		--	--	--
175	0	20	-0.07675	-0.00974	0.3095		0.04766	0.28126	0.07653		0.31986
175	5	20	0.74014	-0.05684	0.77292		0.44646	0.72322	0.5586		0.91387
175	10	20	0.99082	0.51314	-0.15953		1.03959	1.39644	1.00228		1.77045
175	15	20	1.41176	-0.04503	0.94405		0.71008	0.88851	0.86328		1.25048
175	20	20	1.65144	-0.29482	1.44053		0.96685	1.39932	1.27141		1.89135
175	25	20	2.28144	-0.47009	1.57381		0.73861	1.23552	0.79576		1.47681
175	30	20	0.08101	0.01448	0.10325		0.00333	0.02582	0.00705		0.03386
--	--	--	--	--	--		--	--	--
185	0	20	0.30834	0.18464	-0.02229		0.09411	0.17739	0.19372		0.33869
185	5	20	2.11273	0.57509	-0.0216		0.30842	0.83835	0.55196		0.89453
185	10	20	1.89002	0.1588	0.08864		0.31121	0.3689	0.42007		0.74432
185	15	20	1.9568	-0.17202	1.16782		0.52426	0.67827	0.60433		1.16895
185	20	20	2.82746	-0.73112	1.37045		0.64663	0.67631	0.6736		1.03171
185	25	20	-0.0747	-0.28139	-0.93888		0.35569	0.71824	0.63101		1.55202
185	30	20	-0.42481	0.04737	-0.09114		0.16275	0.49726	0.29077		1.172
--	--	--	--	--	--
-28.3	0	30	0	0	0
-28.3	5	30	0	0	0
-28.3	10	30	0	0	0
-28.3	15	30	0	0	0
-28.3	20	30	0	0	0
-28.3	25	30	0	0	0
-28.3	30	30	0	0	0

## Sheet: z=25
x	y	z	u	v	w		u'v'	u'w'	v'w'		k
-40	0	25	0.22664	-0.09153	0.25556		0.58152	0.97732	0.98118		1.40603
-40	5	25	-0.79936	-1.17178	-1.21519		2.46023	3.73774	2.74514		4.66365
-40	10	25	0.54333	0.25691	-0.3845		0.96056	1.58003	1.06181		1.91073
-40	15	25	1.75923	-0.34565	-0.67061		0.10911	0.4367	0.17964		0.51455
-40	20	25	1.12004	-0.32264	-0.03273		0.08427	0.27196	0.12795		0.31585
-40	25	25	0.55168	-0.30887	-0.22991		0.05949	0.27529	0.10203		0.32734
-40	30	25	0.43842	-0.04068	-0.03976		0.13446	0.95806	0.26732		1.21207
--	--	--	--	--	--		--	--	--
5	0	25	-0.37087	-0.1272	0.46901		0.9193	4.66672	1.15844		4.90612
5	5	25	-0.95208	-4.7239	0.61566		25.6177	31.7691	27.0112		42.7042
5	10	25	-3.61606	-8.88547	2.8616		25.377	27.6659	28.0585		40.6741
5	15	25	1.54429	-12.3308	2.12555		21.7694	39.1706	22.9474		45.6016
5	20	25	0.50963	-4.41097	0.7096		19.9252	30.6051	16.3765		36.5266
5	25	25	-3.30855	-0.51167	3.0438		4.6543	7.02899	4.81966		8.62896
5	30	25	-0.57504	-0.03329	0.51278		0.14654	0.75598	0.1699		0.78073
--	--	--	--	--	--		--	--	--
20	0	25	2.19082	0.00156	0.31514		0.44787	2.67221	0.35312		2.77764
20	5	25	5.21886	-4.14066	2.71471		26.385	25.8584	24.2813		38.3356
20	10	25	1.25489	-4.36218	1.00545		25.3165	27.4394	21.7059		37.7782
20	15	25	-3.8269	-1.98398	1.92971		11.9553	13.9952	11.8235		19.0461
20	20	25	-4.75287	-1.37037	2.5819		9.95713	13.3618	10.6333		17.3526
20	25	25	-4.76494	-1.80748	1.63057		6.99908	14.3916	9.39828		17.3066
20	30	25	-0.13338	0.0173	0.08622		0.01403	0.21221	0.04495		0.37446
--	--	--	--	--	--		--	--	--
40	0	25	3.36417	0.02983	1.07741		0.68255	3.54797	0.7431		3.63227
40	5	25	10.9781	-1.73718	4.06975		21.5786	21.8543	19.9108		31.7548
40	10	25	3.87642	-2.85464	-1.56486		24.1996	26.0995	23.3304		36.933
40	15	25	-1.22151	-3.71124	-1.07671		15.4869	20.3977	16.2824		26.6045
40	20	25	-3.82576	-2.68764	-1.83328		9.07017	14.0888	10.1812		17.4602
40	25	25	-5.45335	-1.3201	-0.00902		4.3684	8.19935	5.42923		9.84015
40	30	25	-0.63991	-0.05691	-0.29886		0.04515	0.32496	0.07465		0.37209
--	--	--	--	--	--		--	--	--
60	0	25	4.11686	0.06704	1.99482		1.29568	5.98084	1.05755		6.21915
60	5	25	12.0477	-1.63565	4.07636		16.1811	18.8352	14.6252		25.2137
60	10	25	4.41192	-1.44321	-1.65781		19.7325	20.9931	17.0405		29.228
60	15	25	-1.98431	-0.00899	-1.64665		9.70833	12.5251	7.30076		15.8667
60	20	25	-4.17975	0.048	-0.20451		4.8657	6.68971	5.28398		8.6341
60	25	25	-3.92794	-0.36688	1.60573		4.17011	6.70069	4.8648		8.29417
60	30	25	-0.76807	-0.00946	1.3266		0.08088	0.50843	0.12848		0.5741
--	--	--	--	--	--		--	--	--
80	0	25	0.93409	-0.08857	-0.37622		0.25018	1.64665	0.22533		1.67279
80	5	25	7.85755	-1.05289	2.0369		18.5818	20.4444	11.576		28.0376
80	10	25	-0.17745	0.03974	-1.62253		13.1076	12.702	11.3914		18.7049
80	15	25	-2.72089	0.23317	0.09467		6.49379	6.78999	6.02795		9.69131
80	20	25	-2.69127	-0.67071	0.97428		4.61748	5.48096	4.81855		7.51566
80	25	25	-3.003	0.02525	2.19247		4.84086	5.64315	4.74589		7.67984
80	30	25	-1.73048	-0.0757	1.23197		0.40819	1.57985	0.43468		1.63913
--	--	--	--	--	--		--	--	--
100	0	25	1.12401	-0.1543	-0.76663		0.33148	1.60107	0.31588		1.63563
100	5	25	4.40456	-0.49422	1.02397		11.1244	14.1545	10.0781		18.184
100	10	25	-0.69455	0.2424	-1.42284		9.7296	9.98735	8.0318		14.0838
100	15	25	-1.80807	-0.12272	-0.17788		5.45165	6.31149	5.56199		8.71489
100	20	25	-1.97956	-0.24595	0.41235		3.79449	5.5729	4.16202		7.01366
100	25	25	-1.69847	-0.09307	2.28262		2.5436	3.32585	2.76412		4.39435
100	30	25	-0.86199	-0.11771	0.28018		0.10306	0.49184	0.12035		0.51037
--	--	--	--	--	--		--	--	--
120	0	25	2.25475	-0.18324	1.46812		2.39651	5.88505	1.65731		6.62731
120	5	25	2.72762	0.37091	0.51572		5.91932	7.49919	5.04034		9.58553
120	10	25	0.77465	0.20598	-0.37913		4.8919	6.24062	4.82671		8.13297
120	15	25	-1.241	-0.0271	0.0468		3.15507	3.86733	3.64255		5.39316
120	20	25	-0.0443	0.69749	1.10056		3.75848	4.56853	4.42469		6.44957
120	25	25	0.03919	-0.18192	2.5494		2.88957	3.96634	3.23332		5.1692
120	30	25	0.01193	0.01394	0.20884		0.04407	0.29662	0.08055		0.3582
--	--	--	--	--	--		--	--	--
140	0	25	1.18297	-0.17148	0.75066		1.02402	3.16409	0.95296		3.32648
140	5	25	0.86398	-0.48228	0.75088		1.87244	2.41689	1.24688		3.10244
140	10	25	0.2848	0.03764	-0.61446		2.03889	2.96698	2.04627		3.67009
140	15	25	0.15707	0.55303	-0.35473		1.53235	2.30612	1.67031		2.86963
140	20	25	0.45115	0.28155	1.13515		2.09954	2.46412	2.42713		3.52408
140	25	25	1.63495	-0.29196	1.7987		1.72762	2.85439	1.92606		3.45415
140	30	25	-0.18446	-0.08713	-0.36738		0.02293	0.15786	0.03648		0.17783
--	--	--	--	--	--		--	--	--
160	0	25	0.39572	-0.16425	1.52823		0.25341	0.73337	0.27454		0.78315
160	5	25	1.09796	-0.57737	0.83789		0.69463	0.99501	0.58082		1.21372
160	10	25	0.89116	-0.27747	0.08729		1.19868	1.55907	1.1333		1.99719
160	15	25	0.96023	-0.29823	0.72898		0.92758	1.38323	1.19169		1.82644
160	20	25	1.74605	-0.39109	1.08217		1.67471	2.07814	1.82815		2.82275
160	25	25	2.0836	-0.19159	1.37124		1.12169	1.82321	1.2879		2.23682
160	30	25	0.44354	0.04614	0.6488		0.04496	0.23726	0.0435		0.24152
--	--	--	--	--	--		--	--	--
175	0	25	0.29273	-0.06081	1.245		0.29303	0.81013	0.28608		0.8621
175	5	25	1.23294	-0.36805	0.77295		0.42851	0.72029	0.55138		0.90732
175	10	25	1.2134	-0.56826	-0.03461		0.97107	1.27942	1.03427		1.67447
175	15	25	1.44538	-0.88152	1.08152		0.78977	1.24061	0.97357		1.57775
175	20	25	2.43498	-0.16423	2.29683		1.14925	2.04481	1.40896		2.48334
175	25	25	1.69233	-0.65286	1.04651		0.69185	1.6244	0.99653		1.94597
175	30	25	0.15405	0.01413	0.33725		0.02986	0.15459	0.04127		0.16675
--	--	--	--	--	--		--	--	--
185	0	25	-0.04953	-0.33874	0.26557		0.50003	0.76258	0.63282		0.67246
185	5	25	2.17786	-0.25359	-0.09974		0.40485	0.75931	0.53316		0.79231
185	10	25	2.34266	-0.27257	0.41076		0.39537	0.44658	0.61658		0.68271
185	15	25	2.78312	-0.70786	0.37385		0.54541	0.64124	0.7934		0.9269
185	20	25	2.5669	-0.62244	1.33693		0.64649	0.77118	0.69159		0.94733
185	25	25	0.19452	-0.09162	-0.43433		0.37349	1.18974	0.72731		1.83024
185	30	25	-0.08632	0.16953	-0.40098		0.17502	0.86305	0.38613		1.97307
--	--	--	--	--	--
-26	0	30	0	0	0
-26	5	30	0	0	0
-26	10	30	0	0	0
-26	15	30	0	0	0
-26	20	30	0	0	0
-26	25	30	0	0	0
-26	30	30	0	0	0

## Sheet: z=30
x	y	z	u	v	w		u'v'	u'w'	v'w'		k
-40	0	30	0.16264	-0.48603	0.52584		0.42815	0.65401	0.59117		0.88185
-40	5	30	0.01629	-0.45827	0.16844		1.13807	1.66905	1.28148		2.11772
-40	10	30	-0.09511	-1.30776	-0.28594		1.68447	3.01849	2.07857		3.66541
-40	15	30	1.20237	-0.42185	-0.12847		0.48663	1.2743	0.67083		1.46861
-40	20	30	0.25287	-0.54503	-0.48141		0.15898	0.75209	0.2197		0.81501
-40	25	30	-0.36274	-0.06522	-0.56825		0.33908	1.96887	0.51813		2.19312
-40	30	30	0.05144	0.1874	-0.01718		0.16459	1.14561	0.32486		1.44412
--	--	--	--	--	--		--	--	--
5	0	30	1.43806	-0.07083	0.35511		1.66465	8.71484	1.77388		8.90186
5	5	30	9.95324	-6.6762	2.01226		33.2579	44.1296	35.2902		57.5054
5	10	30	8.92114	-4.26695	-0.96284		42.9455	37.6947	44.1824		62.8783
5	15	30	12.1593	-10.0998	-1.54071		34.1567	34.9912	27.6786		49.2771
5	20	30	0.57761	-3.02278	1.56381		28.3815	35.411	22.5233		45.3876
5	25	30	-4.70269	-0.79072	1.33053		10.6334	15.6878	10.2153		19.1624
5	30	30	-0.75923	-0.02606	-0.47084		0.13718	0.72602	0.17024		0.75909
--	--	--	--	--	--		--	--	--
20	0	30	1.13626	0.10458	0.19152		0.26336	2.34586	0.37545		2.51597
20	5	30	11.9915	-2.92903	1.57205		27.7688	30.2077	33.7406		46.2908
20	10	30	11.5184	-6.99356	-1.05439		37.6604	33.0411	39.1796		55.3955
20	15	30	3.83637	-5.95049	1.177		33.9637	40.7791	26.0724		53.0704
20	20	30	-4.01228	-3.8521	-0.90112		15.9116	23.8153	17.5148		29.7762
20	25	30	-4.89919	-2.17695	-1.61094		12.366	17.5804	10.6803		21.5258
20	30	30	-1.19087	-0.04921	-0.71676		0.13485	0.75696	0.15543		0.77846
--	--	--	--	--	--		--	--	--
40	0	30	6.96696	-0.33944	-0.45261		2.00096	10.3044	1.89065		10.5046
40	5	30	14.3186	-2.72164	3.47822		20.0854	21.5254	23.7485		32.9081
40	10	30	7.43111	-3.19757	-1.83203		30.9186	32.327	24.6075		44.9408
40	15	30	-2.4368	-0.30545	-1.43733		20.2984	21.7199	14.6938		29.7297
40	20	30	-5.48512	-0.29569	-1.26922		6.86591	8.43765	7.39354		11.4689
40	25	30	-5.95119	-0.96153	0.84057		5.13562	7.39464	5.73132		9.42943
40	30	30	-0.82369	-0.00741	-0.02723		0.12515	0.68531	0.12063		0.69678
--	--	--	--	--	--		--	--	--
60	0	30	7.98783	-0.06896	2.27114		3.52921	13.2786	2.65753		14.1696
60	5	30	11.3581	-2.06237	2.41357		22.8508	24.1698	16.5779		33.2618
60	10	30	-0.87562	-0.70682	-1.20168		18.1235	19.8957	12.6955		26.9518
60	15	30	-4.71241	-1.26611	-0.66516		5.93507	6.59845	5.23321		9.00432
60	20	30	-4.57661	-1.60998	1.01188		5.27965	6.24792	4.90671		8.33784
60	25	30	-5.11263	-1.34606	2.40449		4.02915	6.63315	4.40288		7.99648
60	30	30	-0.96469	-0.06754	0.08364		0.09084	0.48482	0.11063		0.50463
--	--	--	--	--	--		--	--	--
80	0	30	1.5741	0.03888	-0.09122		0.38766	2.3362	0.3041		2.43061
80	5	30	6.91935	-0.98437	0.58011		21.6596	24.9041	16.3844		33.0054
80	10	30	-1.7695	-0.74103	-1.37485		15.799	13.1404	13.4934		21.416
80	15	30	-4.27186	-1.75732	-0.35995		5.35467	6.21413	5.30477		8.49994
80	20	30	-4.3043	-1.72308	1.76087		4.21356	5.84829	4.60605		7.53078
80	25	30	-3.91927	-1.32616	2.11394		4.46093	6.52459	5.37553		8.47604
80	30	30	-0.91382	-0.01363	1.10341		0.14272	0.69539	0.1742		0.72713
--	--	--	--	--	--		--	--	--
100	0	30	0.85046	-0.04913	-0.02572		0.26157	1.20377	0.17913		1.31054
100	5	30	7.21549	-1.03644	0.42399		10.8157	14.1	7.42255		17.9579
100	10	30	-0.78897	-0.06762	-0.80023		7.53505	8.3618	6.89831		11.5025
100	15	30	-2.71897	-0.83751	-0.54799		4.77166	6.05791	4.91363		7.99568
100	20	30	-1.91005	-1.79153	1.77479		3.73069	4.74883	3.76381		6.22744
100	25	30	-2.66389	-0.42839	2.60911		3.96718	5.58934	4.32698		7.14601
100	30	30	-0.55729	-0.0761	0.25616		0.1366	0.59292	0.16794		0.62495
--	--	--	--	--	--		--	--	--
120	0	30	0.58624	-0.09267	0.57953		0.63076	2.00219	0.45572		2.18068
120	5	30	1.94726	-0.36038	0.51214		4.91767	5.73654	3.47514		7.57533
120	10	30	0.16047	-0.35169	-0.2018		3.47738	3.43042	3.71356		5.32002
120	15	30	0.46669	-0.97355	-0.00313		2.60433	3.30101	3.13206		4.59288
120	20	30	0.20592	-1.00388	1.32372		3.28706	3.95641	3.86932		5.61649
120	25	30	1.1916	-0.83973	2.43731		2.23876	3.31427	2.36823		4.11937
120	30	30	0.15175	0.02007	0.40073		0.08684	0.38043	0.10267		0.39749
--	--	--	--	--	--		--	--	--
140	0	30	0.116	-0.14063	0.07228		0.10688	0.31496	0.11118		0.33407
140	5	30	0.5593	-0.89603	0.37959		1.31222	1.55071	1.29107		2.09717
140	10	30	0.52743	-0.60951	0.02811		1.02917	1.35222	1.07744		1.76366
140	15	30	0.82939	-0.92662	0.15972		1.37909	1.83349	1.6103		2.46117
140	20	30	0.97202	-1.0591	0.74056		1.40703	1.80602	1.54195		2.41424
140	25	30	1.88799	-0.43565	1.21171		1.41566	2.33412	1.62509		2.84919
140	30	30	0.1037	0.02712	0.15706		0.00643	0.04969	0.00928		0.05367
--	--	--	--	--	--		--	--	--
160	0	30	0.03894	-0.0434	-0.13118		0.01483	0.07931	0.01781		0.08231
160	5	30	0.95372	-0.83334	0.45095		0.60917	0.89922	0.61203		1.10653
160	10	30	1.00604	-0.95243	-0.00602		0.67469	0.92051	0.56384		1.14201
160	15	30	1.32704	-1.34847	0.55844		1.00923	1.27797	1.36194		1.87358
160	20	30	1.97777	-0.71424	0.74114		1.21171	1.88471	1.36296		2.3359
160	25	30	2.16401	-0.42154	0.75626		0.66987	1.1241	0.78017		1.36964
160	30	30	0.27573	0.02457	0.30081		0.01809	0.08474	0.02128		0.08813
--	--	--	--	--	--		--	--	--
175	0	30	0.04618	-0.04522	-0.22214		0.00904	0.05051	0.00958		0.05146
175	5	30	0.95356	-0.97303	0.48214		0.67167	1.03855	0.78578		1.30546
175	10	30	1.99143	-0.89555	0.23798		0.89995	1.03682	0.85374		1.40878
175	15	30	1.26146	-1.34477	0.3573		1.05569	1.16718	1.34126		1.80736
175	20	30	1.65879	-1.00984	0.4214		0.53853	1.10061	0.62165		1.26406
175	25	30	1.64201	-0.6685	0.34247		0.56313	1.33065	0.74812		1.543
175	30	30	-0.01491	0.00444	0.03726		0.00246	0.03159	0.00744		0.05323
--	--	--	--	--	--		--	--	--
185	0	30	0.15273	-0.37557	0.03105		0.07584	0.21625	0.18366		0.83094
185	5	30	1.23537	-1.06681	0.27707		0.46114	0.70273	0.55073		1.36005
185	10	30	2.34757	-0.86074	0.09043		0.5107	0.447	0.52034		0.48862
185	15	30	1.91635	-0.33568	0.96106		0.6545	0.81864	0.82259		1.48888
185	20	30	1.94924	-0.16272	0.76276		0.52526	0.72369	0.73509		0.69123
185	25	30	-0.44284	0.31691	-0.6516		0.25915	1.25525	0.48062		1.95309
185	30	30	0.58567	0.3314	-0.9293		0.1457	0.85071	0.32694		2.66611
--	--	--	--	--	--
-22.4	0	30	0	0	0
-22.4	5	30	0	0	0
-22.4	10	30	0	0	0
-22.4	15	30	0	0	0
-22.4	20	30	0	0	0
-22.4	25	30	0	0	0
-22.4	30	30	0	0	0
